# Supplementary material
Source: HighWire-hosted journal article supplement (http://dmd.aspetjournals.org/highwire/filestream/66640/field_highwire_adjunct_files/0/Supplemental_68445.pdf)
Supplement: Supplemental_68445.pdf [file Supplemental_68445.pdf]

# **Simvastatin hydroxy acid fails to attain sufficient CNS tumor exposure to achieve cytotoxic effect: Result of a preclinical cerebral microdialysis study**

**Authors:** Yogesh T. Patel, Megan O. Jacus, Abigail D. Davis, Nidal Boulos, David C. Turner, Pradeep K. Vuppala, Burgess B. Freeman III, Richard J. Gilbertson, Clinton F. Stewart

**Journal:** Drug Metabolism and Disposition

## **Supplemental material**

### **Materials and methods**

#### ***Animals***

CD1 nude mice were purchased from Charles River (Wilmington, MA). Animals were kept under controlled temperature and humidity conditions, and were exposed to 12 hour day and night cycles. All animal studies performed were approved by the Institutional Animal Care and Usage Committee (IACUC) of St. Jude Children's Research Hospital.

#### ***Chemicals and reagents***

SV dosing suspension was prepared in 0.5% carboxymethylcellulose at a concentration of 10 mg/mL. SV (analytical standard) and fluvastatin (FV) were purchased from Sigma-Aldrich (St. Louis, MO). Simvastatin hydroxy acid ammonium salt (SVA, 98%) was purchased from Toronto Research Chemicals Inc. (North York, ON, Canada). Lovastatin (LV, 99.8%) was purchased from EMD Millipore Chemicals (Billerica, MA). Acetonitrile, methyl t-butyl ether (TBME), ammonium acetate, and acetic

acid purchased from Fisher Scientific (Fair Lawn, NJ). All solvents used were HPLC grade. Water was purified using Milli-Q Advantage A10 system (Millipore, Billerica, MA). CD1 mouse plasma (Na heparin) was purchased from BioChemed (Winchester, VA). Artificial cerebrospinal fluid (aCSF) consisting of NaCl (148 mM), KCl (4 mM), MgCl<sub>2</sub> (0.8 mM), CaCl<sub>2</sub> (1.4 mM), Na<sub>2</sub>HPO<sub>4</sub> (1.2 mM), NaH<sub>2</sub>PO<sub>4</sub> (0.3 mM), and dextrose (5 mM), was prepared in-house and pH was adjusted to 7.4 using 1N NaOH (Benveniste and Huttemeier, 1990).

### ***Use of in-silico approach to prioritize compounds***

We used two different published *in-silico* models to predict brain to plasma partition coefficient of a drug using its physico-chemical properties to prioritize statins for preclinical PK studies. The first *in-silico* model was a mathematical model (**Equation A**) designed by Feher et al that correlates physico-chemical descriptors to logBB (logarithm of ratio between brain and plasma exposure) (Feher et al., 2000),

$$\log BB = 0.4275 - 0.0017 \times PSA + 0.1092 \times \text{clogP} - 0.3873 \times \text{HBA} \quad \text{Equation A}$$

The second model was designed based on several molecular descriptors identified by Mensch et al and Pajouhesh et al as having influence on CNS penetration (Pajouhesh and Lenz, 2005; Mensch et al., 2009). We have assigned binary code (1 or 0) to these molecular descriptors based on their favorable and unfavorable value and calculated a “rule of thumb” score. Favorable values of molecular descriptors were: molecular weight (MW) <450 gram/mole, logarithm of hydrophobicity (clogP) <5, number of hydrogen (H) bond donor (HBD) <3, number of H-bond acceptor (HBA) <7, number of rotatable bond (NRB) <8, number of H-bond (NHB) <8, polar surface area (PSA) <90 Å<sup>2</sup>, sum of nitrogen and oxygen atom (N + O) <6, and clogP - (N + O) > 0

(Pajouhesh and Lenz, 2005; Mensch et al., 2009). Molecular descriptors required for these *in-silico* models were obtained from the PubChem database (<http://www.ncbi.nlm.nih.gov/pccompound>).

### ***Plasma pharmacokinetic study***

A plasma PK study of SV was performed in CD1 nude mice bearing cortical implants of mouse ependymoma (Mohankumar et al., 2015). Simvastatin (10 mg/mL prepared in 0.5% carboxymethylcellulose) was administered at dosage of 100 mg/kg via oral gavage. A serial sacrifice design was used to allow for collection of adequate plasma volume for analysis of SV and its active metabolite SVA. Blood samples from three mice were collected at each of 0.25, 1.5, 3.5, 6, and 8 hr after the SV dose using heparinized cardiac punctures. Immediately after blood sample collection, plasma was separated and samples were stored at -80 °C until analysis.

### ***Cerebral microdialysis study***

Cerebral microdialysis studies were performed in CD1 nude mice (20 - 30 g) bearing cortical implants of mouse ependymoma. Tumor cells (*Ink4a/Arf-null* + *RTBDN* + *Luci*, 2000 cells) and microdialysis guide cannula (MD-2255, BASi) were stereotactically implanted into the cerebral cortex using a previously reported method (Carcaboso et al., 2010; Atkinson et al., 2011). Once *in vivo* tumor bioluminescence measured to be minimum of  $10^7$  photons/sec (~ 14 days), the microdialysis study was performed by removing the stylet in the guide cannula, and replacing it with a semipermeable 1 mm microdialysis probe with molecular weight cut-off of 38 KDa (MD-2211, BASi). The microdialysis probe was continuously perfused with aCSF at a flow rate of 0.5  $\mu$ L/min using a perfusion pump. To improve microdialysis recovery of SVA,

$\beta$ -cyclodextrin (BCD) was added to the microdialysis perfusate (aCSF) at a concentration of 10% w/v. After probe equilibration for an hour, the microdialysis study was initiated by dosing animals with SV suspension (100 mg/kg, orally) prepared in 0.5% carboxymethylcellulose at a concentration of 10 mg/mL. Over the next six hours, the microdialysis fractions were collected at flow rate of 0.5  $\mu$ L/min for 1 hr interval using a fraction collector. Dialysate samples were collected in a tube containing 20  $\mu$ L of 100 mM ammonium acetate (pH 4.5) to maintain an acidic pH of the dialysate. During the microdialysis experiment, three blood samples were collected by retroorbital bleed at 0.083, 1.5, and 4.75 hr after the dose to measure plasma concentration of SVA. Plasma and dialysate samples collected during the microdialysis study were stored at -80  $^{\circ}$ C until analysis.

Recovery of each microdialysis probe was determined using in vitro recovery experiments (de Lange et al., 1997), where microdialysis probes were submerged into the SVA solution prepared in aCSF at a concentration of 750 ng/mL ( $C_{\text{bulk}}$ ) and perfused with aCSF solution containing 10% w/v BCD at a flow rate of 0.5  $\mu$ L/min. After probe equilibration for 1 hour, subsequent dialysate fractions of 1 hr interval were collected for next three hours. Microdialysis probe recovery was calculated using **Equation B**.

$$\% \text{ Recovery Ratio (RR)} = \frac{C_{\text{dialysate}}}{C_{\text{bulk}}} \times 100 \quad \text{Equation B}$$

### **Sample analysis**

SV and SVA concentrations in mouse plasma samples and SVA concentration in dialysate samples were analyzed using a validated liquid chromatography tandem mass spectrometry (LC MS/MS) method. Calibration standards were prepared at a range of 1 - 500 ng/mL for SV in mouse plasma, and at 0.5 - 250 ng/mL for SVA in mouse plasma

and aCSF. Initial sample preparation was done on wet ice. Protein precipitation with acetonitrile and liquid-liquid extraction with TBME was used for SV and SVA assays, respectively.

For the SV assay, an aliquot of 25  $\mu\text{L}$  of mouse plasma was mixed with 10  $\mu\text{L}$  of IS working solution (LV, 250 ng/mL) and 20  $\mu\text{L}$  of 100 mM ammonium acetate buffer (pH  $4.5 \pm 0.05$ ) in a glass tube. The resulting mixture was vortexed with 80  $\mu\text{L}$  of acetonitrile for 1 min, followed by centrifugation at 3000 rpm for 5 min. A 5  $\mu\text{L}$  of organic supernatant was injected into the chromatographic system.

For the SVA assay, an aliquot of 25  $\mu\text{L}$  mouse plasma or aCSF was mixed with 10  $\mu\text{L}$  of IS (FV, 25 ng/mL) and 20  $\mu\text{L}$  of 100 mM ammonium acetate buffer (pH  $4.5 \pm 0.05$ ) in a glass tube. The resulting mixture was vortexed with TBME (1 mL) for 10 min, followed by centrifugation at 3000 rpm for 10 min. The organic supernatant was then transferred to a glass vial, dried, and reconstituted with 80  $\mu\text{L}$  of mobile phase. An aliquot of 5  $\mu\text{L}$  was injected onto the chromatographic column. All separations were performed using a Phenomenex Luna C18 column (3 $\mu\text{L}$ , 100 Å 50 x 2.00 mm) maintained at 25°C. The mobile phase consisted of 1 mM ammonium acetate (pH  $4.5 \pm 0.05$ ) and acetonitrile with 0.01% acetic acid (20:80, v/v) for the SV assay, and 5 mM ammonium acetate (pH  $4.5 \pm 0.05$ ) and acetonitrile (25:75 v/v) for the SVA assay and were pumped at a flow rate of 0.25 mL/min. Mass spectrometric analysis was performed using AB SCIEX API-4000 mass spectrometer system (Framingham, MA). The MRM transitions of  $m/z$  436.30 > 285.20 and  $m/z$  422.30 > 199.20 were chosen for SV and LV, respectively for SV assay, and  $m/z$  435.25 > 319.25 and  $m/z$  410.10 > 348.25 were chosen for SVA and FV, respectively for SVA assay. All the methods were found to be

linear and reproducible with typical  $r$  values  $> 0.99$ . The intra- and inter- day assay coefficients of variation were  $< 10\%$  with accuracies ranging from 91.4 to 108%.

### ***Pharmacokinetic data analysis***

A population based pharmacokinetic model was used to derive pharmacokinetic parameters for the plasma disposition of SV and SVA. A drug metabolism pharmacokinetic (DMPK) model (**Figure 1 in the manuscript**) consisting of a gut and a plasma compartment was fitted to the plasma concentration time data obtained from plasma PK study. Mathematically  $K_a$  represents first order absorption of simvastatin after oral drug administration,  $CL_m/F$  represents metabolic clearance of simvastatin lactone to simvastatin hydroxy acid,  $CL_{sva}/F$  represents first order systemic clearance of simvastatin hydroxy acid from the central compartment, whereas  $V_{sv}/F$  and  $V_{sva}/F$  represent the plasma volumes of distribution for simvastatin and simvastatin hydroxy acid. The apparent mean pharmacokinetic parameters along with their standard error of estimates (SEE) and inter-individual variability (IIV) were estimated using nonlinear mixed effect modeling (NONMEM 7.2, ICON development solutions). First order conditional estimation (FOCE) method with interaction was used derive population mean parameter estimates and variance terms, whereas SEE were derived using importance sampling method (IMP) with interaction by performing only the expectation step (EONLY=1) (Bauer, 2011). To characterize the extent of SVA penetration in ependymoma tumor, it is necessary to derive extensive plasma as well as tumor extracellular fluid (tECF) profile in each mouse used in microdialysis study. However, we were limited to three plasma samples per animal because of volume of plasma that could be withdraw and required for bioanalysis of SVA. Therefore, we derived a limited-

sampling model (LSM) to collect plasma samples during microdialysis study using D-optimality implemented in ADAPT 5 (D'Argenio, 1981; D'Argenio et al., 2009). Plasma PK parameters obtained previously were used as priors to derive LSM.

SVA plasma concentrations obtained during microdialysis study were modeled together with SA and SVA data obtained during plasma PK study to derive full SVA plasma concentration time profile for each mouse enrolled in microdialysis study. Estimation method and modeling techniques were similar to that mentioned above. SVA area under plasma concentration time curve ( $AUC_{\text{plasma}}^{0 \rightarrow t \text{ hr}}$ ) was estimated by integration of concentration time profile using modeling, whereas area under tECF concentration time curve ( $AUC_{\text{tECF}}^{0 \rightarrow t \text{ hr}}$ ) was estimated using the trapezoidal method by replacing below LLOQ data with LLOQ as depicted in **Equation C**.

$$AUC_{\text{tECF}}^{0 \rightarrow t \text{ hr}} = \sum_{i=1}^t C_i \times \tau \quad \text{Equation C}$$

Where  $C_i$  is the SVA concentration observed in  $i^{\text{th}}$  dialysate sample collected over 1 hour interval ( $\tau$ ). The extent of SVA distribution in tECF ( $K_{p,u}$ , tumor to plasma partition coefficient of SVA) was calculated as a ratio of area under unbound tECF to total plasma concentration time profile ( $AUC_{\text{tECF}}^{0 \rightarrow 6 \text{ hr}} / AUC_{\text{plasma}}^{0 \rightarrow 6 \text{ hr}}$ ).

## References

- Atkinson JM, Shelat AA, Carcaboso AM, Kranenburg TA, Arnold LA, Boulos N, Wright K, Johnson RA, Poppleton H, Mohankumar KM, Feau C, Phoenix T, Gibson P, Zhu L, Tong Y, Eden C, Ellison DW, Priebe W, Koul D, Yung WK, Gajjar A, Stewart CF, Guy RK, and Gilbertson RJ (2011) An integrated in vitro and in vivo high-throughput screen identifies treatment leads for ependymoma. *Cancer cell* **20**:384-399.
- Bauer R (2011) NONMEM users guide: Introduction to NONMEM 7.2.0 (Solutions ID ed, Ellicott City, Maryland.
- Benveniste H and Huttemeier PC (1990) Microdialysis--theory and application. *Progress in neurobiology* **35**:195-215.
- Carcaboso AM, Elmeliogy MA, Shen J, Juel SJ, Zhang ZM, Calabrese C, Tracey L, Waters CM, and Stewart CF (2010) Tyrosine kinase inhibitor gefitinib enhances topotecan penetration of gliomas. *Cancer research* **70**:4499-4508.
- D'Argenio DZ (1981) Optimal sampling times for pharmacokinetic experiments. *J Pharmacokinetic Biopharm* **9**:739-756.
- de Lange EC, Danhof M, de Boer AG, and Breimer DD (1997) Methodological considerations of intracerebral microdialysis in pharmacokinetic studies on drug transport across the blood-brain barrier. *Brain research Brain research reviews* **25**:27-49.
- D'Argenio DZ, Schumitzky A, and Wang X (2009) ADAPT 5 User's Guide: Pharmacokinetic/Pharmacodynamic Systems Analysis Software. *Biomedical Simulations Resource, Los Angeles.*

- Feher M, Sourial E, and Schmidt JM (2000) A simple model for the prediction of blood-brain partitioning. *International journal of pharmaceutics* **201**:239-247.
- Mensch J, Oyarzabal J, Mackie C, and Augustijns P (2009) In vivo, in vitro and in silico methods for small molecule transfer across the BBB. *Journal of pharmaceutical sciences* **98**:4429-4468.
- Mohankumar KM, Currle DS, White E, Boulos N, Dapper J, Eden C, Nimmervoll B, Thiruvenkatam R, Connelly M, Kranenburg TA, Neale G, Olsen S, Wang YD, Finkelstein D, Wright K, Gupta K, Ellison DW, Thomas AO, and Gilbertson RJ (2015) An in vivo screen identifies ependymoma oncogenes and tumor-suppressor genes. *Nat Genet* **47**:878-887.
- Pajouhesh H and Lenz GR (2005) Medicinal chemical properties of successful central nervous system drugs. *NeuroRx : the journal of the American Society for Experimental NeuroTherapeutics* **2**:541-553.
